# Supplementary material for: A Quantitative Clinicopathological Signature for Predicting Recurrence Risk of Pancreatic Ductal Adenocarcinoma After Radical Resection
Source: PubMed Central journal article supplement (PMC6861378; doi:10.3389/fonc.2019.01197), 2019-11-12

## Supplementary Material

Supplement Figure 1. Pairwise comparison of cumulative recurrence rate for different tumor progression patterns

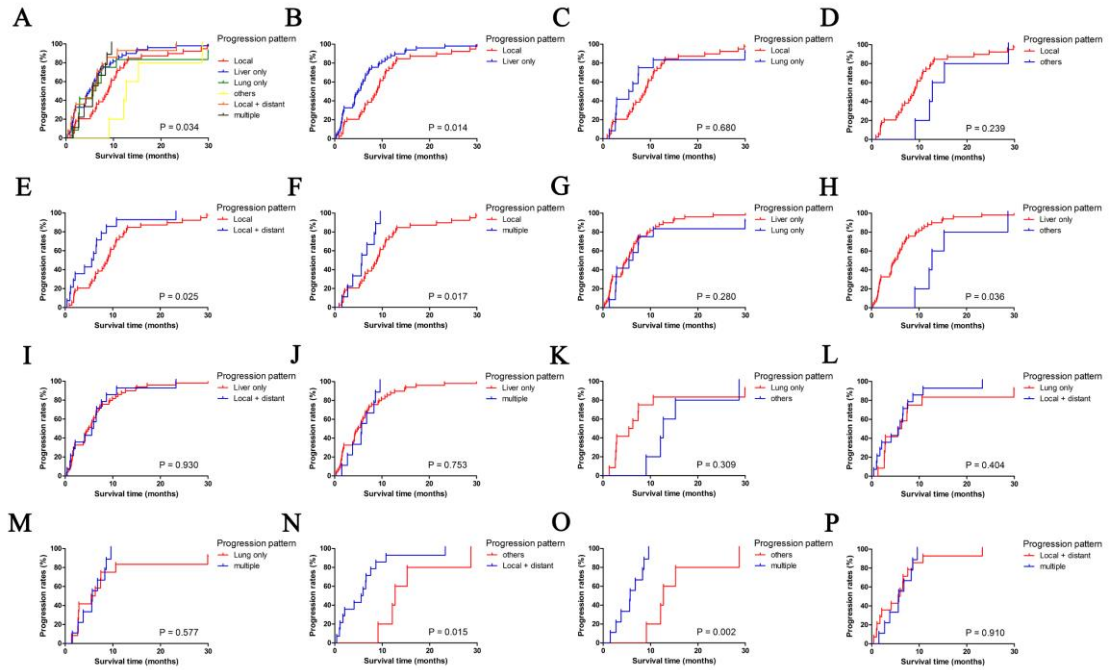

Supplement Figure 2. Pairwise comparison of post progression survival for different tumor progression patterns

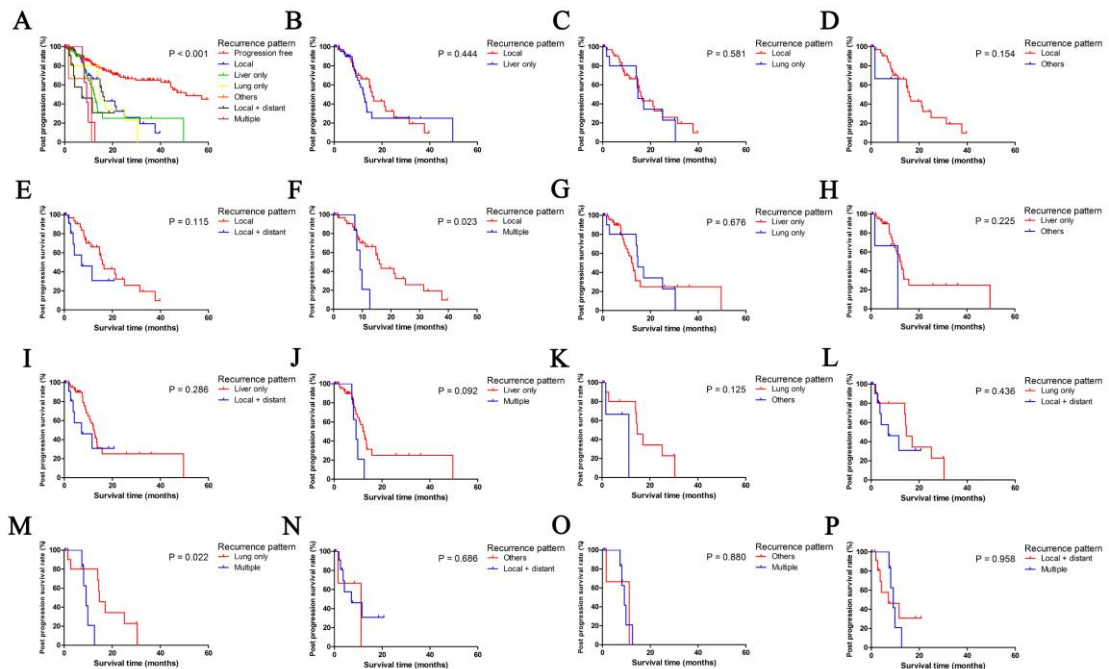

Supplement: Data_Sheet_1.pdf [file Data_Sheet_1.pdf]
